1 **Microinjection into the *Caenorhabditis elegans* embryo using an uncoated glass**  
2 **needle enables cell lineage visualization and reveals cell-non-autonomous**  
3 **adhesion control**

4

5 Yohei Kikuchi<sup>a</sup> and Akatsuki Kimura<sup>a,b,\*</sup>

6

7 <sup>a</sup>Cell Architecture Laboratory, Structural Biology Center, National Institute of  
8 Genetics, Mishima 411-8540, Japan

9 <sup>b</sup>Department of Genetics, School of Life Science, SOKENDAI (The Graduate  
10 University for Advanced Studies), Mishima 411-8540, Japan

11 \*Corresponding author

12 E-mail: [akkimura@nig.ac.jp](mailto:akkimura@nig.ac.jp) (AK)

13

14 **Running Head: Nematode embryo direct microinjection**

15

16 **Abbreviations:** EB: egg buffer; SEM: scanning electron microscopy; SGM: Shelton's  
17 growth medium

18 **Abstract**

19 Microinjection is a useful method in cell biology, with which exogenous substances  
20 are introduced into a cell in a location- and time-specific manner. The *Caenorhabditis*  
21 *elegans* embryo is an important model system for cell and developmental biology.  
22 Applying microinjection to the *C. elegans* embryo had been difficult due to the rigid  
23 eggshell surrounding the embryo. In 2013, microinjection method using a carbon-  
24 coated quartz needle for the *C. elegans* embryo was reported. To prepare the needle,  
25 unfortunately, special equipment is required and thus a limited number of researchers  
26 can use this method. In this study, we established a method for the microinjection of  
27 drugs, dyes, and microbeads into the *C. elegans* embryo using an uncoated glass  
28 needle that can be produced in a general laboratory. This method enabled us to easily  
29 detect cell lineage up to adult stages by injecting a fluorescent dye into a blastomere.  
30 We also found a cell-non-autonomous control mechanism of cell adhesion;  
31 specifically, the injection of an actin inhibitor into one cell at the 2-cell stage  
32 enhanced adhesion between daughter cells of the other cell. Our microinjection  
33 method is expected to be used for broad studies and could facilitate various  
34 discoveries using *C. elegans*.

## 35 **Introduction**

36 Microinjection is a useful method in cell biology. It can directly deliver substances  
37 prepared outside the cell to the inside of the cell with desired timing and to a desired  
38 location. For example, the role of microtubules and actomyosin in cell division were  
39 characterized by injecting inhibitors (O'Connell *et al.*, 1999; Strickland *et al.*, 2005),  
40 and the growth rate of the astral microtubules was measured by injecting oils or  
41 microbeads (Hamaguchi *et al.*, 1986). The *Caenorhabditis elegans* embryo is a major  
42 model system in cell biology. Sophisticated methods for gene manipulation enable  
43 researchers to express fluorescent proteins (Chalfie *et al.*, 1994), and the transparent  
44 embryonic cells permit observers to follow the processes of cell division and  
45 development under a microscope (Gönczy and Rose, 2005). Unfortunately, direct  
46 microinjection into the embryo has been considered difficult, as the embryo is covered  
47 by a rigid eggshell (Edgar *et al.*, 1994; McNally and McNally, 2005; Olson *et al.*,  
48 2012; Marcello *et al.*, 2013; Stein and Golden, 2015).

49 To deliver substances into the *C. elegans* embryo, researchers perform  
50 microinjection into the gonads or soak the embryo in a solution containing the  
51 substance. Microinjection into the gonad is a popular approach to knock down gene  
52 function via RNAi or to obtain transgenic strains (Mello *et al.*, 1991). After  
53 microinjection into the gonad, and with sufficient time allotted, the substance will be  
54 incorporated into the embryo. Previously, using this method, microbeads or magnetic  
55 beads were introduced into the embryo to measure viscosity or forces inside the cells  
56 (Daniels *et al.*, 2006; Garzon-Coral *et al.*, 2016). However, this method is not  
57 efficient, as these substances will be diluted in the gonad; the time required for  
58 materials to be delivered to the embryos is also a disadvantage. The other method  
59 (soaking) is also difficult when using most substances as the eggshell acts as a

60 permeability barrier. To enable these materials to penetrate the embryo from the  
61 outside (Strome and Wood, 1983; Schierenberg and Junkersdorf, 1992), permeability  
62 must be increased by knocking down genes such as *perm-1* (Carvalho *et al.*, 2011). It  
63 should be noted that the knockdown of *perm-1* causes embryonic lethality, and are  
64 thus invasive. Most importantly, with both methods—injection into the gonad and  
65 soaking—it is impossible to introduce substances into the embryo in a time- or  
66 location-specific manner.

67 In 2013, a method for direct microinjection into *C. elegans* was developed using  
68 a carbon-coated quartz needle (Brennan *et al.*, 2013). This report demonstrated that  
69 substances could be directly introduced into the embryo. Unfortunately, the carbon-  
70 coated quartz needle is difficult to obtain in an ordinary biology lab (including that of  
71 the authors of this paper), as carbon coating requires special equipment.

72 In this study, we succeeded in establishing a microinjection method for *C.*  
73 *elegans* embryos using an ordinary glass needle without special coating. With this  
74 method, we were able to deliver substances directly into the embryo in a time- and  
75 location-specific manner. We also evaluated the invasiveness of the method by  
76 quantifying the rate of cell division and hatching after injection. By injecting a  
77 fluorescent dye into a blastomere, this method enabled us to detect cell lineage easily,  
78 up to adult stages. We also found a cell-non-autonomous control mechanism of cell  
79 adhesion as follows: the injection of an actin inhibitor into one cell at the 2-cell stage  
80 enhanced the adhesion between the daughter cells of the other cell.

## 81 **Results**

### 82 **Preparation of glass needles for microinjection**

83 In an attempt to establish a method for microinjection into *C. elegans* embryos using  
84 ordinary glass needles, we prepared glass needles with a shape similar to the carbon-  
85 coated quartz needles used in the preceding research (Brennan *et al.*, 2013). By  
86 changing the input parameters of a micropipette puller (Sutter Instrument, P-1000), we  
87 prepared three types of glass needles with long and thin tip regions. We measured the  
88 outer and inner diameters of the tips of the glass needles by scanning electron  
89 microscopy (SEM) (Fig. 1A). The average inner diameters of the three types of the  
90 needles were 100 nm, 150 nm, and 657 nm, respectively, and we referred to each type  
91 as ' $\phi$ 100', ' $\phi$ 150', and ' $\phi$ 660', respectively (Fig. 1B). The  $\phi$ 100-type had the smallest  
92 inner diameter, and was the most similar to the quartz needle among the three types.  
93 We also quantified the ejection volume of the glass needles using the method of the  
94 previous report (Brennan *et al.*, 2013). We ejected a fluorescent-dextran solution into  
95 glycerol (Fig. 1C) with a pressure of 1,000 hPa (14.5 psi) for 0.5 s, which was the  
96 minimum setting used to eject a reproducible volume with our equipment. The ejection  
97 volume of the  $\phi$ 100-type was 16.0 fl, which was comparable to that of the quartz  
98 needle in the previous study (Brennan *et al.*, 2013) (Fig. 1D). By assuming the long  
99 axis of the embryo is 50  $\mu$ m and the short axis is 30  $\mu$ m, the volume of the embryo  
100 was estimated to be 24,000  $\mu$ m<sup>3</sup>. Therefore, the ejection volume was estimated to be  
101 about 0.1 % of the embryo volume. The ejection volume of the  $\phi$ 150-type was 33.8 fl.  
102 We were not able to quantify the ejection volume of the  $\phi$ 660-type (see Methods). As  
103 the ejection volume of the  $\phi$ 100-type was closest to that of the quartz needle, we used  
104 the  $\phi$ 100-type needle for subsequent experiments unless otherwise indicated.

105

106 **Microinjection into the embryo with the glass needle was achieved by precise**  
107 **alignment of the micromanipulation system**

108 As an initial attempt, we arranged the micromanipulation system in a similar manner  
109 to that used for the carbon-coated quartz needle (Brennan *et al.*, 2013). Using a  
110 holding pipette, an embryo was immobilized through its posterior pole. We attempted  
111 to insert the  $\phi 100$ -type needle, but it was unsuccessful as the needle tip slipped along  
112 the surface of the eggshell. Next, we fixed the embryo onto a silane-coated coverslip,  
113 which is used to fix starfish oocytes for microinjection (Kikuchi and Hamaguchi,  
114 2012). This was also not successful as silane was not sticky enough to fix the position  
115 of the *C. elegans* embryo when it is pushed by the glass needle. Then, we returned to  
116 the approach using holding pipettes. To avoid the slippage of the needle on the  
117 eggshell, we found that two kinds of alignment were critical, namely, the ‘hold-needle  
118 alignment’ and ‘embryo-needle alignment’ (Fig. 2A, B). The ‘hold-needle alignment’  
119 means that we precisely aligned the holding pipette and the glass needle in a straight  
120 line (‘hold-needle alignment’ in Fig. 2B). This hold-needle alignment is often used for  
121 microinjection into mammalian oocytes (Kimura and Yanagimachi, 1995). To achieve  
122 the alignment, a curved structure was introduced into both the holding pipette and the  
123 glass needle (Fig. 2A). The precise alignment was realized through adjustments under  
124 the microscope using fine micromanipulators. The ‘embryo-needle alignment’  
125 indicates that the long axis of the embryos is perpendicular to the needle, such that the  
126 curvature of the eggshell at the point of injection will be minimum to avoid slippage.  
127 Additionally, a brake structure was introduced into the holding pipette for fine  
128 adjustments in aspiration pressure (Fig. 2A). With these efforts, we finally succeeded  
129 in inserting a  $\phi 100$ -type glass needle into the *C. elegans* embryo (Fig. 2A, enlarged  
130 image at the bottom).

131

## 132 **Cells divided and embryos hatched after the microinjection procedure**

133 We next evaluated the invasiveness of the microinjection procedure. We assessed the  
134 invasiveness of three steps individually, which were embryo immobilization, needle  
135 insertion, and buffer injection. We conducted the manipulation at the 1-cell stage, and  
136 scored the rate at which embryos entered the 4-cell stage and hatched. The embryos  
137 were maintained by the holding pipette until the 4-cell stage, and were then transferred  
138 to Shelton's growth medium (SGM) (Shelton and Bowerman, 1996) and cultured  
139 overnight at 25 °C to score the rate of hatching.

140 First, the effect of embryo immobilization by the holding pipette was  
141 evaluated (Fig. 3A). Immobilization was conducted at various positions of the  
142 eggshell. All embryos divided twice to enter the 4-cell stage without noticeable delay  
143 and subsequently hatched ( $n = 12/12$ ).

144 Next, we evaluated the effect of inserting the needle into the cytoplasm (but  
145 not injecting) (Fig. 3B, Punctured). In some cases, when the glass needle was  
146 withdrawn, the cytoplasm leaked out of the eggshell. We noticed that the embryos with  
147 significant leakage failed cytokinesis, but if the leakage was small, the success rate of  
148 cytokinesis was high. We then set criteria that excluded embryos in which leakage  
149 occurred for more than 3 s after needle withdrawal from further analyses; 94% ( $n =$   
150 29/31) of embryos passed this criterion. Among the embryos that passed this criterion,  
151 100% ( $n = 29/29$ ) entered the 4-cell stage, and 62% ( $n = 18/29$ ) of the embryos  
152 hatched (Fig. 3B, Punctured).

153 Finally, we evaluated the effect of injecting solution into the embryo. We  
154 injected Texas Red-dextran in 0.8× egg buffer (EB) into 1-cell stage embryos (Fig. 3B,  
155 Dextran-injected). After injection, 71% ( $n = 32/45$ ) of embryos passed the criterion for

156 leakage (i.e. 3-s). Among the embryos that passed the criterion, 69% ( $n = 22/32$ ) of the  
157 embryos entered the 4-cell stage and 44% ( $n = 14/32$ ) of embryos hatched. A  
158 successful example of cell division after the injection is shown in Fig. 3C and Video 1.  
159 GFP::H2B (histone) is a chromosome marker to monitor chromosome segregation, and  
160 GFP::PH (pleckstrin homology domain) is a membrane marker to monitor cytokinesis.  
161 When we used the  $\phi 150$ -type glass needles, 64% ( $n = 7/11$ ) passed the leakage  
162 criterion. Among the embryos that passed this criterion, 57% ( $n = 4/7$ ) reached the 4-  
163 cell stage and 29% ( $n = 2/7$ ) hatched. When we used the  $\phi 660$ -type needle, massive  
164 leakage occurred and none of the embryos passed the criterion ( $n = 9$ ). From the  
165 results, we concluded that we successfully established a method of direct injection into  
166 the *C. elegans* embryos using  $\phi 100$ -type needles; after the injection of dextran at the  
167 1-cell stage, ~70% of embryos that passed the criterion and divided twice to enter the  
168 4-cell stage; moreover, greater than 40% hatched to become larvae. In conclusion, our  
169 method could be applied to analyze cell division and the development of embryos.

170

### 171 **Sizes of injectable substances**

172 We next attempted to clarify the size range of injectable substances using this method.  
173 Using the three types of glass needles, we tested the ejection of substances of various  
174 sizes (dextrans or microbeads) into glycerol, or if they could be injected into 1-cell  
175 stage embryos (Table 1). The substances were loaded into the needle from the wider  
176 end. Dextran with MWs of 3,000 and 10,000 could be ejected into glycerol and into  
177 the embryo using all three types of the glass needles. Dextran with MW of 70,000 was  
178 ejectable only with the  $\phi 660$ -type needle, although the tips of the  $\phi 660$ -type needles  
179 were easily clogged with the dextran of this size. In this case, sonication and filtration  
180 treatments helped to avoid clogging.



181 We next investigated microbeads of different sizes. Microbeads of 15–20 nm (in  
182 diameter) could be ejected into glycerol and into the embryos using all types of  
183 needles. In addition, 25-nm microbeads could also be ejected and injected if  
184 aggregations in the injection mixture were resolved before injection. Larger sized-  
185 microbeads (50 or 100 nm) could not be ejected or injected even after sonication,  
186 filtration, or dilution. In summary, dextran with a MW up to 10,000 and microbeads  
187 with a diameter up to 25 nm could be injected into the 1-cell stage embryo.

188

### 189 **Location-specific injection into 2-cell stage embryos**

190 Thus far, we showed that using our method, substances can be injected directly into  
191 the *C. elegans* embryo with the desired timing (e.g. the 1-cell stage). We next  
192 attempted location-specific injection, which cannot be achieved by microinjection into  
193 the gonad or soaking (see Introduction). Dextran (MW = 3,000) was injected into one  
194 of the two cells (AB cell) at the 2-cell stage (Fig. 4). To achieve this, the holding  
195 pipette captured the eggshell near the AB cell (Fig. 4A). After cell division, at the 4-  
196 cell stage, fluorescent signals were observed only in the descendants of the AB cell  
197 (i.e. ABa and ABp cells), and not in the other cells (i.e. EMS and P2 cells) (Fig. 4B,  
198 Video 2).

199 We further investigated whether the fluorescent signal could be detected in later  
200 stages. After the injection of fluorescent dextran into AB cells at the 2-cell stage, the  
201 fluorescent dextran signal was observed selectively in the AB cell lineage throughout  
202 embryogenesis (Fig. 5A–I). The AB cell lineage is known to differentiate primarily  
203 into ectodermal cells including hypodermis, neurons, and pharynx (Sulston *et al.*,  
204 1983). At the ~100-cell stage, approximately half of the cells of the injected embryo  
205 had dextran signal, and they occupied the surface of the embryo, as expected for

206 ectodermal cells (Fig. 5I, Video 3). These embryos hatched after overnight incubation  
207 ( $n = 5/5$ ). In hatched larvae, signals were observed in the hypodermis, neurons, and  
208 pharynx (Fig. 5J–O, arrows), but not in the germ cells derived from the P2 cell, as  
209 expected. Some signals were detected in the intestine, but they were thought to be  
210 autofluorescence as un-injected controls also had these signals (Fig. 5P–U).  
211 Surprisingly, the fluorescent dextran signal was not degraded or removed from the  
212 worm but the signals remained clear until the L4 stage (Fig. 5M). Some signals were  
213 detected even in adult worms in expected locations such as the pharynx (Fig. 5O). Our  
214 results indicate that the injection of fluorescent-dextran into a blastomere is an easy  
215 and powerful method to trace the cell lineage.

216

### 217 **A cell-non-autonomous effect of the actin cortex for proper cell arrangement**

218 Location-specific injection enables us to inhibit the function of specific proteins in a  
219 desired cell. Such analysis can characterize cell-non-autonomous effects; if the  
220 inhibition of a protein in one cell affects the behavior of other cells, the effect is cell-  
221 non-autonomous. By injecting an actin inhibitor (Cytochalasin D) into the AB cell, we  
222 investigated the cell-non-autonomous effect of actin cortex integrity for proper cell  
223 arrangement at the 4-cell stage embryo.

224 The four cells at this stage are arranged into a diamond pattern in which the cells  
225 are attached to each other, except for between ABa and P2 cells (Fig. 6A, left). Our  
226 group has previously demonstrated that asymmetric attraction, in which the EMS cell  
227 tightly adheres to ABa and ABp cells, but weakly adheres to the P2 cell (Fig. 6A,  
228 middle), is important for the diamond arrangement even when the eggshell is deformed  
229 (Yamamoto and Kimura, 2017). It was not clear why the EMS cell adheres strongly to  
230 a set of cells (ABa and ABp) but not to the other (P2). A straightforward explanation is

231 that the P2 cell has limited amounts of adhesive molecules (e.g. E-cadherin) and thus  
232 cannot strongly adhere to the EMS cell. However, when a P1 cell was isolated from an  
233 AB cell at the two-cell stage (after the eggshell was removed at the 1-cell stage), EMS  
234 and P2 (the daughters of P1) strongly adhered (Fig. 6A, right), which did not occur  
235 when the P1 cell was not isolated from eggshell-removed embryos (Fig. 6A, middle).  
236 The difference was quantified by measuring the length of contact area between EMS  
237 and P2 (Fig. 6B). The result suggests that the P2 cell has the potential to adhere  
238 strongly to the EMS cells, but that the potential is suppressed in normal conditions.  
239 From this result, we hypothesized that the suppression is caused by adhesion between  
240 EMS and ABa/p cells.

241 To demonstrate the cell-non-autonomous effect of ABa/p on the strength of  
242 adhesion between EMS and P2, we injected Cytochalasin D into the AB cell (the  
243 mother of ABa/p cells) to disrupt the cortical integrity of the cells, including the  
244 adhesion function. As expected, the injected AB cell did not divide and E-cadherins  
245 (cell adhesion molecule) were no longer detected on the surface (Video 4). Consistent  
246 with our hypothesis, in this condition, EMS and P2 cells adhered strongly to each  
247 other and an increased E-cadherin signal was detected on the border of EMS and P2  
248 cells (Fig. 6C). The result demonstrated that loss of adhesion between EMS and ABa/p  
249 cells leads to enhanced adhesion between EMS and P2 cells.

250 To account for the cell-non-autonomous effect, we propose a limited pool model  
251 (Fig. 6D), in which the amount of cell adhesion molecules such as E-cadherin is  
252 limited in EMS cells. The majority of the limited pool is normally used for its  
253 adhesion to ABa/p cells. As a result, the EMS cell adheres to the P2 cell weakly. Our  
254 experiment demonstrated that, for the normal distribution of E-cadherin and weak  
255 adhesion at the EMS-P2 border, physical attachment between EMS and ABa/p cells is

256 not sufficient, but an intact AB cell cortex is required. E-cadherin molecules are  
257 known to be distributed asymmetrically in 1-cell stage embryos, such that they are  
258 enriched in the AB cell but existed at low levels in the P1 cell (the mother of EMS and  
259 P2 cells) (Munro *et al.*, 2004; Yamamoto and Kimura, 2017). The limited pool model  
260 with the asymmetric distribution of E-cadherin explains the underlying mechanism for  
261 the asymmetric attraction between the blastomeres demonstrated in the previous study  
262 (Yamamoto and Kimura, 2017).

263

## 264 **Discussion**

265 Previously, direct microinjection into the *C. elegans* embryo was possible only by  
266 using carbon-coated quartz needles (Brennan *et al.*, 2013). Unfortunately, this method  
267 is restrictive for most researchers due to the special equipment needed to coat the  
268 needle. In this study, we made microinjection possible by using uncoated glass needles  
269 that are available for most researchers. Direct substance delivery was demonstrated by  
270 injecting fluorescent dextran or microbeads in a time- and location-specific manner.  
271 When the microinjection was performed at the 1-cell stage, ~70% of the cells (that  
272 fulfilled the leakage criteria) divided at least twice and greater than 40% of the  
273 embryos hatched to become larvae. The 1-cell stage embryo seems to be fragile  
274 compared to the later stage embryos as (i) the final modifications of the eggshell that  
275 protect the embryo are completed after a few mitotic divisions (Stein and Golden,  
276 2015), and (ii) the rate of cell division upon eggshell removal is low at this stage  
277 based on our experience. Therefore, the high success rate for the 1-cell stage implies  
278 that our method is applicable for later embryonic stages.

279 The differences between the microinjection method using carbon-coated quartz  
280 needles (Brennan *et al.*, 2013) and that using the glass needle in this study are

281 summarized as follows. First is the availability of the needles. The carbon coating of  
282 the quartz needles requires special equipment inaccessible for most biology  
283 laboratories, whereas the glass needles can be made using an ordinary pipette puller.  
284 Second, the arrangement of the embryo, the injection needle, and the holding pipette  
285 seems to be more restricted for the glass needle (Fig. 2). Injection with glass needles  
286 requires precise alignments between the holding pipette ('hold-needle alignment') and  
287 the glass needle; moreover, the long axis of the ellipsoidal embryo needs to be  
288 perpendicular to the axis of the holding pipette and the glass needle ('embryo-needle  
289 alignment'). In contrast, such strict conditions seemed not to be required for  
290 microinjection using the carbon-coated quartz needle, as the carbon-coated quartz  
291 needle could be inserted into an embryo that is immobilized at the posterior cortex by  
292 the holding pipette (Brennan *et al.*, 2013). The advantage of the carbon-coated quartz  
293 needle over the glass needle might not be its hardness to penetrate through the  
294 eggshell, but its grip to the surface of the eggshell to avoid slippage. The reason as to  
295 why the carbon-coated quartz needle has better grip is unclear.

296           We could not compare the invasiveness of the two methods. In this study, we  
297 quantified the success rates of cell division and hatching. In contrast, there was no  
298 such description in the previous report, whereas the authors stated that the injection  
299 itself does not inhibit early embryogenesis (Brennan *et al.*, 2013). Considering the  
300 reasonable success rate of cell division and hatching with the glass needle, we think  
301 our method is sufficiently useful for microinjection in cell and developmental studies.  
302 The previous report also found that the carbon-coated quartz needle can be used  
303 repeatedly for injection because it is hard. The glass needle can also be used  
304 repeatedly for injection, at least three or four times, indicating the glass needle is hard  
305 enough for microinjection experiments.

306           Various experiments involving microinjection approaches have now become  
307 possible for *C. elegans* embryos in ordinary biology labs. This approach can also be  
308 easily applied to other nematode species with similar eggshells. In this study, we  
309 demonstrated that by injecting a fluorescent dye into a blastomere, we could detect the  
310 AB cell descendants easily up to adult stages. We also demonstrated a cell-non-  
311 autonomous control mechanism of cell adhesion; specifically, inhibiting actin in one  
312 cell (AB) at the two-cell stage influenced adhesion between daughter cells of the other  
313 cell (P1). Microinjection methods have been used for various experiments using many  
314 cell types including mouse oocytes, HeLa cells, and *Xenopus* eggs. Such experiments  
315 have now become possible for nematode embryos. For example, microbeads coated  
316 with DNA can induce an ectopic polar body-like structure in mouse oocytes (Deng and  
317 Li, 2009), induce a nuclear envelope-like structure and avoid autophagy in HeLa cells  
318 (Kobayashi *et al.*, 2015), or induce the assembly of microtubules and a bipolar spindle  
319 in *Xenopus* egg extracts (Heald *et al.*, 1996). As another example, microbeads coated  
320 with Aurora kinase A were reported to act as an artificial centrosome in *Xenopus* egg  
321 extracts, and their role in cell division has been investigated (Nguyen *et al.*, 2014). It  
322 will be interesting to inject microbeads, in which the surface is functionalized in  
323 different ways. We expect that the combination of the microinjection method with  
324 sophisticated genetics of *C. elegans* will be a powerful approach to drive cell and  
325 developmental biology.

326

## 327 **Materials and Methods**

### 328 **Strains and maintenance of *C. elegans***

329 N2 (Bristol), CAL1041 (*oxIs279* [*pie-1p*::GFP::*his-58* + *unc-119*(+)]; *ItIs38*[pAA1;

330 *pie-1p*::GFP::PH(PLC1<sup>delta1</sup>) + *unc-119*(+)], and CAL1851 (*hmr-1*(cp21[*hmr-1*::GFP +

331 LoxP]) I; *wjIs108* [*pie-1p::mCherry::his-58::pie-1\_3'UTR* + *unc-119(+)*]) strains were  
332 used in this study. N2 was used as the wild type. CAL1041 was obtained by mating  
333 strains EG4601 and OD58 and CAL1851 was obtained by mating strains LP172 and  
334 CAL941 (*unc-119* (ed3); *wjIs108* [*pie-1p::mCherry::his-58::pie-1\_3'UTR* + *unc-*  
335 *119(+)*]). These strains were maintained using standard procedures (Brenner, 1974).  
336

### 337 **Preparation of glass needles and holding pipettes**

338 Three types of glass needles with different inner diameters ( $\phi$ 100,  $\phi$ 150, and  $\phi$ 660,  
339 Fig. 1), and holding pipettes were prepared from a GD-1 glass capillary (Narishige,  
340 Tokyo, Japan) using a P-1000 micropipette puller (Sutter Instruments, Novato, CA,  
341 USA). The  $\phi$ 100-type needle was created by pulling twice with a parameter set of  
342 (heat [H], pull [Pu], velocity [V], time [T], pressure [Pr]) = (837, 100, 8, 250, 500)  
343 and once with (H, Pu, V, T, Pr) = (837, 100, 15, 250, 500). The  $\phi$ 150-type was created  
344 by pulling once with (H, Pu, V, Delay, Pr) = (788, 40, 80, 200, 500). The  $\phi$ 660-type  
345 was created by pulling twice with (H, Pu, V, T, Pr) = (837, 60, 8, 250, 500) and once  
346 with (H, Pu, V, T, Pr) = (837, 60, 15, 250, 500). The holding pipette for embryo  
347 immobilization was created by pulling once with (H, Pu, V, T, Pr) = (869, 0, 150, 200,  
348 200). To create holding pipettes with an inner diameter of 15–25  $\mu$ m (which is suitable  
349 to immobilize the embryo), the taper region was cut by the “glass-on-glass” method  
350 (pipette cookbook, Sutter). The tip of the holding pipette was fire-polished using a  
351 microforge, MF-900 (Narishige) to create a smooth surface. Curve structures were  
352 prepared both in the holding pipette and glass needle at a position 500  $\mu$ m from the tip  
353 using the microforge (Fig. 2, lower images). The curved structures were created by  
354 bending the respective capillaries for 15–25 degrees by applying heat from one side of  
355 the capillary using the microforge. A brake structure, to avoid acute aspiration, was

356 added to the holding pipette at a region 300  $\mu\text{m}$  from the tip using the microforge. The  
357 brake structure was created by leading the holding pipette into a loop of platinum wire  
358 and heating it uniformly under the microforge.

359

### 360 **Observation of glass needle tip diameter by SEM**

361 The tips of the glass needles were observed and their tip diameters were measured by  
362 SEM (JSM-7500F; JEOL, Tokyo, Japan). Tip segments of the glass needle were  
363 carefully cut out using tweezers and were put on the specimen mount for SEM. To  
364 measure not only the outer diameter but also the inner diameter, needle tips were tilted  
365 on the mount. They were then coated with a 1.5–2-nm thick layer of osmium using a  
366 hollow cathode plasma coater (HPC-1S; Vacuum Device, Mito, Japan), to confer a  
367 conductive property for observation, and then observed by SEM.

368

### 369 **Measurement of ejection volume (Fig. 1CD, Table 1)**

370 Texas Red-conjugated dextran (1.25 mg/ml, MW = 3000; Invitrogen, D3329;  
371 Carlsbad, OR, USA) was loaded into the glass needles using a microloader  
372 (Eppendorf, Hamburg, Germany) and dextran was ejected into a glycerol droplet in the  
373 same manner as performed in a previous report (Brennan *et al.*, 2013). The injection  
374 pressure, injection time, and compensation pressure of a Femtojet (Eppendorf)  
375 microinjector were set to 1,000 hPa (14.5 psi), 0.5 s, and 69 pc, respectively. After  
376 waiting approximately 1 s until the ejected fluorescent dextran changed to a spherical  
377 shape, a generated fluorescent sphere was recorded as a digital image. The diameter of  
378 the fluorescent sphere was measured using ImageJ (National Institutes of Health,  
379 Bethesda, MD, USA), and the ejection volume was estimated from the diameter. An  
380 inverted microscope (Axiovert-100; Zeiss, Oberkochen, Germany) equipped with a



381 10× PH1-ACHROSTIGMAT 0.25 NA objective (Zeiss) was used to measure the  
382 ejection volume. Digital images were obtained using a CCD camera (ORCA C4742-  
383 95; Hamamatsu Photonics, Hamamatsu, Japan) controlled by iVision software  
384 (BioVision Technologies, Exton, PA, USA).

385

### 386 **Embryo immobilization and microinjection**

387 To manipulate the holding pipette, a coarse micromanipulator (ONM-1; Olympus,  
388 Tokyo, Japan) and a fine micromanipulator (ON-2; Olympus) were used. A pneumatic  
389 microinjector (IM-11-2; Narishige) was used for embryo immobilization. For the glass  
390 needle, the MN-4 coarse manipulator (Narishige) and the MMO-203 fine  
391 micromanipulator (Narishige) were used. A pneumatic microinjector (FemtoJet;  
392 Eppendorf) was used for injection. These instruments were equipped on an inverted  
393 microscope (IX71; Olympus). To align the holding pipette and the glass needle (‘hold-  
394 needle alignment’), the tip parts were first visually aligned from a side view (i.e. x-z  
395 view, Fig. 2AB). Subsequently, the alignment was examined from a top view (i.e. x-y  
396 view, Fig. 2B) visually and under the microscope. After the alignment, the holding  
397 pipette and the glass needle were transiently raised toward the z-axis during embryo  
398 mounting. The 1-cell stage embryo was cut from an adult and placed in 0.8× EB (1×  
399 EB: 118 mM NaCl, 48 mM KCl, 2 mM CaCl<sub>2</sub>, 2 mM MgCl<sub>2</sub>) and transferred to a 24 ×  
400 55-mm coverslip (Matsunami, Osaka, Japan); it was then mounted on the inverted  
401 microscope. The embryo was immobilized to the holding pipette by applying a  
402 negative pressure using a configuration in which the long axis of the embryo was  
403 perpendicular to the holding pipette (Fig. 2A, enlarged view at center, Fig. 2B,  
404 ‘embryo-needle alignment’). Subsequently, the holding pipette, the glass needle, and  
405 the central plane of the embryo were all set on the same focal plane. The objective lens

406 was switched to 100× UPlanSApo 1.40 NA and the glass needle was slowly inserted  
407 into the embryo. When injecting a solution into the embryo, injection pressure was  
408 applied after the tip of the needle was inserted approximately 2-3  $\mu\text{m}$  across the cell  
409 membrane. After the introduction of the substance, the glass needle was first  
410 withdrawn by half of the inserted distance, and then the remaining half was withdrawn  
411 after approximately 5 s to ensure that the cytoplasm of the embryo did not leak. To test  
412 hatching, the injected embryo was transferred to SGM (Shelton and Bowerman, 1996)  
413 after it reached the 4-cell stage and was incubated overnight at 25 °C.

414

#### 415 **Observation of *C. elegans* embryos, larvae, and adults**

416 Observation of the embryos except Video 2, Fig. 5I (Video 3), and Fig. 6 (Video 4)  
417 was performed using a CSU-10 spinning-disk confocal system (Yokogawa, Tokyo,  
418 Japan) mounted on the injection microscope (IX71, Olympus) at room temperature.  
419 Digital images were obtained using a CCD camera (iXon; Andor Technology, Belfast,  
420 UK) controlled by IPLab software (BD Biosciences, Tokyo, Japan). Observation of the  
421 embryos in Video 2, Fig. 5I (Video 3), and Fig. 6 (Video 4), larvae and adults, was  
422 performed using a CSU-X1 confocal system (Yokogawa) with another IX71  
423 microscope with an iXon CCD camera controlled by MetaMorph imaging software  
424 (Molecular Devices, Sunnyvale, CA, USA). For signal observation after hatching, the  
425 worms were transferred in a drop of M9 buffer containing 1 mM levamisole (L9756,  
426 Sigma, Saint Louis, MO, USA) and were placed on a 26 × 76-mm coverslip (custom-  
427 made, Matsunami). Image analyses were conducted using ImageJ software. Images  
428 were converted into 8-bit images after brightness and contrast were adjusted using the  
429 ‘auto’ setting of the software. To display the entire body of larva or adult stage  
430 specimens with a single image, several images were stitched together using the

431 MosaicJ, which is a plugin for ImageJ.

432

### 433 **Fluorescent dyes and microbeads used for substance introduction**

434 Three types of dextran, at different molecular weights (MWs), and four types of  
435 microbeads, at different diameters, were examined in this study (Table 1). Texas Red-  
436 conjugated dextrans were used as follows: MW = 3,000 (Invitrogen, D3329), MW =  
437 10,000 (Invitrogen, D1863), and MW = 70,000 (Invitrogen, D1863). Microbeads were  
438 as follows: 15–20 nm in diameter (Qdot 605, Invitrogen, Q10103MP), 25 nm  
439 (micromer®-redF, Micromod 30-00-251; Rostock, Germany), 50 nm (micromer®-  
440 redF, Micromod, 30-00-501), and 100 nm (micromer®-redF, Micromod, 30-00-102).  
441 Three types of dextran were dissolved in 0.8× EB to a final concentration of 1.25  
442 mg/ml. The Qdot sample was diluted 5-fold from the original solution with water. The  
443 concentration of each Micromod microbead solution suspended in water was 10  
444 mg/ml. These solutions including each substance were filled in the tip of the glass  
445 needle from the back end with a microloader, and then the glass needle was connected  
446 to a Femtojet. If the solution was clogged at the tip of the glass needle, aggregation  
447 was resolved using both filtration (25CS020AS, Toyo Roshi, Tokyo, Japan) and  
448 sonication (Q125; QSONICA, Newtown, CT, USA). Sonication was performed for 5 s  
449 at 70% amplitude with a 10 s rest; these treatments were repeated five times.

450

### 451 **Eggshell removal and blastomere isolation**

452 Eggshells were removed using the method of the previous report (Yamamoto and  
453 Kimura, 2017). Embryos were treated with Kao bleach (Kao, Tokyo, Japan) mixed  
454 with 10 N KOH at a 3:1 ratio for 90 s, and then transferred to SGM three times to  
455 wash the bleaching mixture. The vitelline membrane was removed using a mouth

456 pipette with an approximate 30-40  $\mu\text{m}$  tip inner diameter made from the GD-1 glass  
457 capillary (Narishige). To isolate the embryo into two blastomeres at the 2-cell stage,  
458 the eggshell-removed embryo was divided into two blastomeres (AB and P1) by  
459 manual handling using an eyelash in SGM.

460

#### 461 **Statistical comparison of the contact length (Fig. 6B)**

462 From the microscopy images, the length of contact area between EMS and P2 was  
463 measured using ImageJ. Mann-Whitney U test was used to compare mean values. For  
464 the analyses, R ([www.r-project.org](http://www.r-project.org)) was used. The experiments were not randomized,  
465 and the investigators were not blinded to allocation during experiments and outcome  
466 assessment.

467

#### 468 **Cytochalasin D injection into AB cells of 2-cell stage embryos**

469 20  $\mu\text{g}/\text{ml}$  Cytochalasin D (C8273, Sigma) in DMSO and 2.5 mg/ml Texas Red-  
470 conjugated dextran (MW = 3000) in water were mixed at a 1:1 ratio to make a 10-  
471  $\mu\text{g}/\text{ml}$  Cytochalasin D, 1.25-mg/ml dextran solution. This solution was injected into  
472 the AB cells of 2-cell stage embryos of CAL1851 strain. ‘Control injection’ in Fig. 6  
473 means injection of a 1:1 mixture of DMSO and 2.5 mg/ml Texas Red-conjugated  
474 dextran in water into the AB cell. Dextran was used as an injection marker, and the  
475 specific incorporation of Texas Red-conjugated dextran only into the AB cell was  
476 confirmed by fluorescence imaging using the spinning-disk confocal system.

477

478

#### 479 **Acknowledgements**

480 *C. elegans* strains CAL1041 and CAL1851 were prepared by Drs. Kenji Kimura and

481 Kazunori Yamamoto (National Institute of Genetics), respectively. We thank Dr.  
482 Kazunori Yamamoto for discussion, Dr. Emiko Suzuki (National Institute of Genetics)  
483 for teaching SEM operation, Dr. Yukihiisa Hamaguchi (Tokyo Institute of Technology)  
484 for advice on the micromanipulation system, Drs. Takeshi Itabashi, Shin'ichi Ishiwata  
485 (Waseda University), Kenji Ishikawa (Nagoya university), and Shinji Watanabe  
486 (Kanazawa University) for technical help and advice on the carbon-coating of quartz  
487 needles. We also thank the members of our laboratory for their valuable comments and  
488 support. Y.K. is an NIG Postdoctoral Fellow. This work was supported by JSPS  
489 KAKENHI grant numbers JP15H04372, JP15KT0083, JP16H00816, 18H05529, and  
490 18H02414.

491 **Reference**

492

493 Brennan, L. D., Roland, T., Morton, D. G., Fellman, S. M., Chung, S., Soltani, M.,

494 Kevek, J. W., McEuen, P. M., Kempfues, K. J., and Wang, M. D. (2013). Small

495 molecule injection into single-cell *C. elegans* embryos via carbon-reinforced

496 nanopipettes. PLoS ONE 8, e75712.

497 Brenner, S. (1974). The genetics of *Caenorhabditis elegans*. Genetics 77, 71–94.

498 Carvalho, A., Olson, S. K., Gutierrez, E., Zhang, K., Noble, L. B., Zanin, E., Desai,

499 A., Groisman, A., and Oegema, K. (2011). Acute drug treatment in the early *C.*

500 *elegans* embryo. PLoS ONE 6, e24656.

501 Chalfie, M., Tu, Y., Euskirchen, G., Ward, W. W., and Prasher, D. C. (1994). Green

502 fluorescent protein as a marker for gene expression. Science 263, 802–805.

503 Daniels, B. R., Masi, B. C., and Wirtz, D. (2006). Probing single-cell micromechanics

504 in vivo: the microrheology of *C. elegans* developing embryos. Biophys J 90, 4712–

505 4719.

506 Deng, M., and Li, R. (2009). Sperm chromatin-induced ectopic polar body extrusion in

507 mouse eggs after ICSI and delayed egg activation. PLoS ONE 4, e7171.

508 Edgar, L. G., Wolf, N., and Wood, W. B. (1994). Early transcription in

509 *Caenorhabditis elegans* embryos. Development 120, 443–451.

510 Garzon-Coral, C., Fantana, H. A., and Howard, J. (2016). A force-generating

511 machinery maintains the spindle at the cell center during mitosis. Science 352, 1124–

512 1127.

513 Gönczy, P., and Rose, L. S. (2005). Asymmetric cell division and axis formation in the

514 embryo. In: WormBook, The *C. elegans* Research Community, WormBook, 1–20.

- 515 Hamaguchi, M. S., Hamaguchi, Y., and Hiramoto, Y. (1986). Microinjected  
516 polystyrene beads move along astral rays in sand dollar eggs. *Dev Growth Differ* 28,  
517 461–470.
- 518 Heald, R., Tournebize, R., Blank, T., Sandaltzopoulos, R., Becker, P., Hyman, A., and  
519 Karsenti, E. (1996). Self-organization of microtubules into bipolar spindles around  
520 artificial chromosomes in *Xenopus* egg extracts. *Nature* 382, 420–425.
- 521 Kikuchi, Y., and Hamaguchi, Y. (2012). The effect of taxol microinjection on the  
522 microtubular structure in polar body formation of starfish oocytes. *Cytoskeleton*  
523 (Hoboken) 69, 125–132.
- 524 Kimura, Y., and Yanagimachi, R. (1995). Intracytoplasmic sperm injection in the  
525 mouse. *Biol Reprod* 52, 709–720.
- 526 Kobayashi, S., Osakada, H., Mori, C., and Haraguchi, T. (2015). BAF is a cytosolic  
527 DNA sensor that leads to exogenous DNA avoiding autophagy. *Proc. Natl. Acad. Sci.*  
528 U.S.A. 112, 7027–7032.
- 529 Marcello, M. R., Singaravelu, G., and Singson, A. (2013). Fertilization. *Adv. Exp.*  
530 *Med. Biol.* 757, 321–350.
- 531 McNally, K. L., and McNally, F. J. (2005). Fertilization initiates the transition from  
532 anaphase I to metaphase II during female meiosis in *C. elegans*. *Dev. Biol.* 282, 218–  
533 230.
- 534 Mello, C. C., Kramer, J. M., Stinchcomb, D., and Ambros, V. (1991). Efficient gene  
535 transfer in *C. elegans*: extrachromosomal maintenance and integration of transforming  
536 sequences. *EMBO J.* 10, 3959–3970.
- 537 Munro, E., Nance, J., and Priess, J. R. (2004). Cortical flows powered by  
538 asymmetrical contraction transport PAR proteins to establish and maintain anterior-  
539 posterior polarity in the early *C. elegans* embryo. *Dev. Cell* 7, 413–424.

540 Nguyen, P. A., Groen, A. C., Loose, M., Ishihara, K., Wühr, M., Field, C. M., and  
541 Mitchison, T. J. (2014). Spatial organization of cytokinesis signaling reconstituted in a  
542 cell-free system. *Science* *346*, 244–247.

543 O'Connell, C. B., Wheatley, S. P., Ahmed, S., and Wang, Y. L. (1999). The small  
544 GTP-binding protein rho regulates cortical activities in cultured cells during division.  
545 *J Cell Biol* *144*, 305–313.

546 Olson, S. K., Greenan, G., Desai, A., Müller-Reichert, T., and Oegema, K. (2012).  
547 Hierarchical assembly of the eggshell and permeability barrier in *C. elegans*. *J Cell*  
548 *Biol* *198*, 731–748.

549 Schierenberg, E., and Junkersdorf, B. (1992). The role of eggshell and underlying  
550 vitelline membrane for normal pattern formation in the early *C. elegans* embryo. *Roux*  
551 *Arch Dev Biol* *202*, 10–16.

552 Shelton, C. A., and Bowerman, B. (1996). Time-dependent responses to glp-1-  
553 mediated inductions in early *C. elegans* embryos. *Development* *122*, 2043–2050.

554 Stein, K. K., and Golden, A. (2015). The *C. elegans* eggshell. In: *WormBook, The C.*  
555 *elegans Research Community, WormBook*, 1–35.

556 Strickland, L. I., Donnelly, E. J., and Burgess, D. R. (2005). Induction of cytokinesis  
557 is independent of precisely regulated microtubule dynamics. *Mol. Biol. Cell* *16*, 4485–  
558 4494.

559 Strome, S., and Wood, W. B. (1983). Generation of asymmetry and segregation of  
560 germ-line granules in early *C. elegans* embryos. *Cell* *35*, 15–25.

561 Sulston, J. E., Schierenberg, E., White, J. G., and Thomson, J. N. (1983). The  
562 embryonic cell lineage of the nematode *Caenorhabditis elegans*. *Dev. Biol.* *100*, 64–  
563 119.



564 Yamamoto, K., and Kimura, A. (2017). An asymmetric attraction model for the  
565 diversity and robustness of cell arrangement in nematodes. *Development* *144*, 4437–  
566 4449.  
567

568 **Table 1** Relationship between inner diameters of the glass needle and size of ejectable  
 569 substances  
 570

|            | Dextran       |                |                | Microbeads                     |                             |                             |                              |
|------------|---------------|----------------|----------------|--------------------------------|-----------------------------|-----------------------------|------------------------------|
|            | MW =<br>3,000 | MW =<br>10,000 | MW =<br>70,000 | Qdot<br>( $\phi = 15\sim 20$ ) | Micromer<br>( $\phi = 25$ ) | Micromer<br>( $\phi = 50$ ) | Micromer<br>( $\phi = 100$ ) |
| $\phi 100$ | +             | +              | -              | +                              | +                           | -                           | -                            |
| $\phi 150$ | +             | +              | -              | +                              | +                           | -                           | -                            |
| $\phi 660$ | +             | +              | +              | +                              | +                           | -                           | -                            |

571  $\phi$ : diameter of the beads [nm]

572 +: ejectable, +\*: ejectable after filtration and sonication, -: not ejectable

573

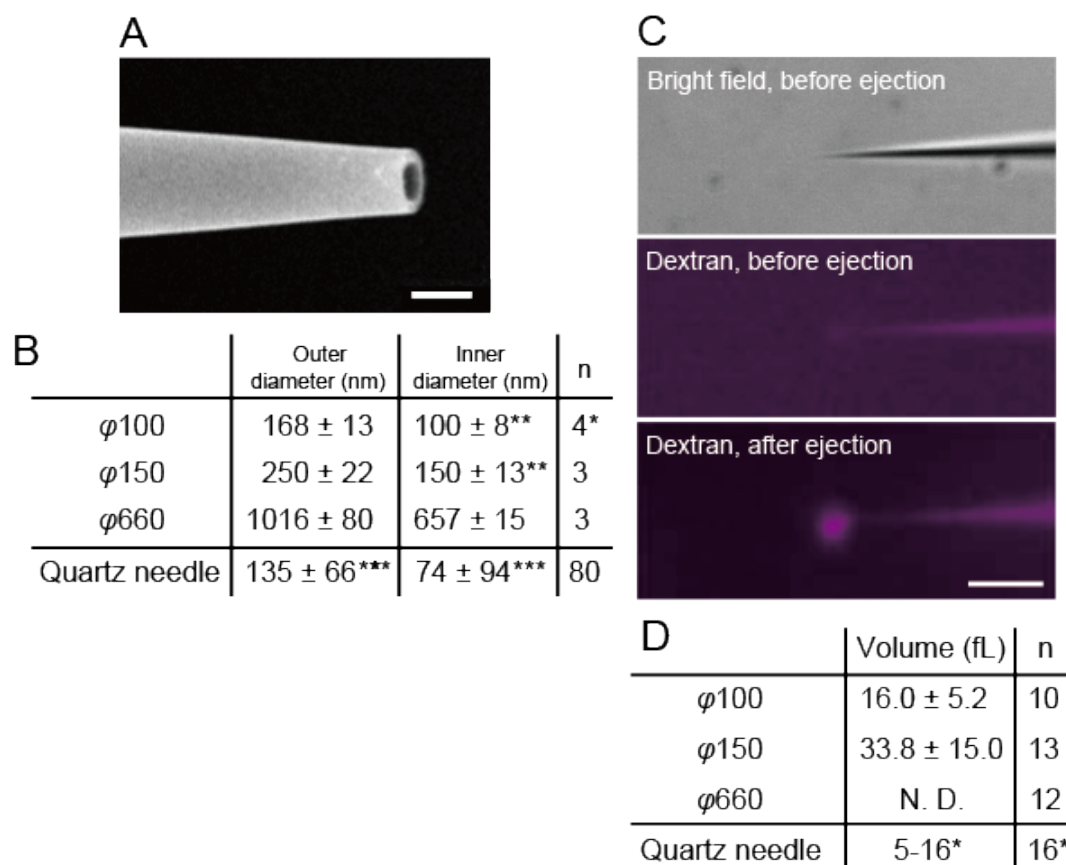

574

575 **Figure 1.** Observations of tip diameter of the glass needle and measurement of  
 576 ejection volumes. (A) Examples of scanning electron microscopy (SEM) images of the  
 577 tip of glass needles are shown. Bar, 1  $\mu\text{m}$ . (B) Outer and inner diameters of the glass  
 578 needle quantified based on the SEM images. \* A needle with the measured outer  
 579 diameter of 353 nm was excluded as it was an apparent outlier possibly due to the  
 580 breakage of the tip during sample preparation for the SEM measurement. \*\* represents  
 581 estimated values calculated based on the measured values of the outer diameter and  
 582 theoretical ratio between the outer and inner diameter. \*\*\* in the bottom row  
 583 represents values from previous research (Brennan *et al.*, 2013). (C) Bright field and  
 584 fluorescence images of the glass needle before and after the ejection of dextran into  
 585 glycerol to quantify the ejection volume. Bar, 10  $\mu\text{m}$ . (D) Ejection volumes and  
 586 percentages of the ejection volumes relative to the embryo volume. \* in the bottom  
 587 row represents values from previous research (Brennan *et al.*, 2013).

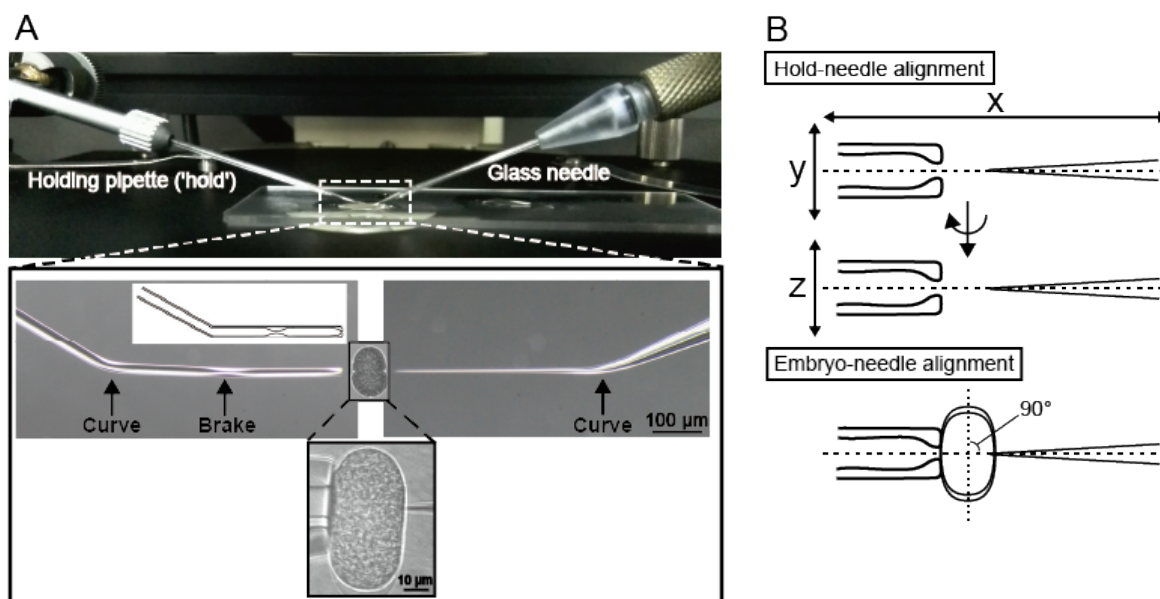

588

589 **Figure 2.** Micromanipulation system used in this study. (A) The upper image is a side

590 view of the micromanipulation system on an inverted microscope. The holding pipette

591 for immobilization of the embryo is on the left side and the glass needle for

592 microinjection is on the right side. Lower images comprise an enlarged view of the

593 region enclosed by the dashed line in the upper image. The bottom images are an

594 actual example of micromanipulation. The tip region of both the holding pipette and

595 the glass needle were precisely aligned in a straight line to insert the glass needle into

596 the embryo. The pattern diagram shows the curve and brake structure within the

597 holding pipette. (B) The ‘hold-needle alignment’ indicates the alignment between the

598 holding pipette (‘hold’) and the glass needle, which should align straight from both x-

599 y and x-z views. The ‘embryo-needle alignment’ denotes the alignment between the

600 embryo and the needle. The long axis of the embryo should be perpendicular to the

601 needle.

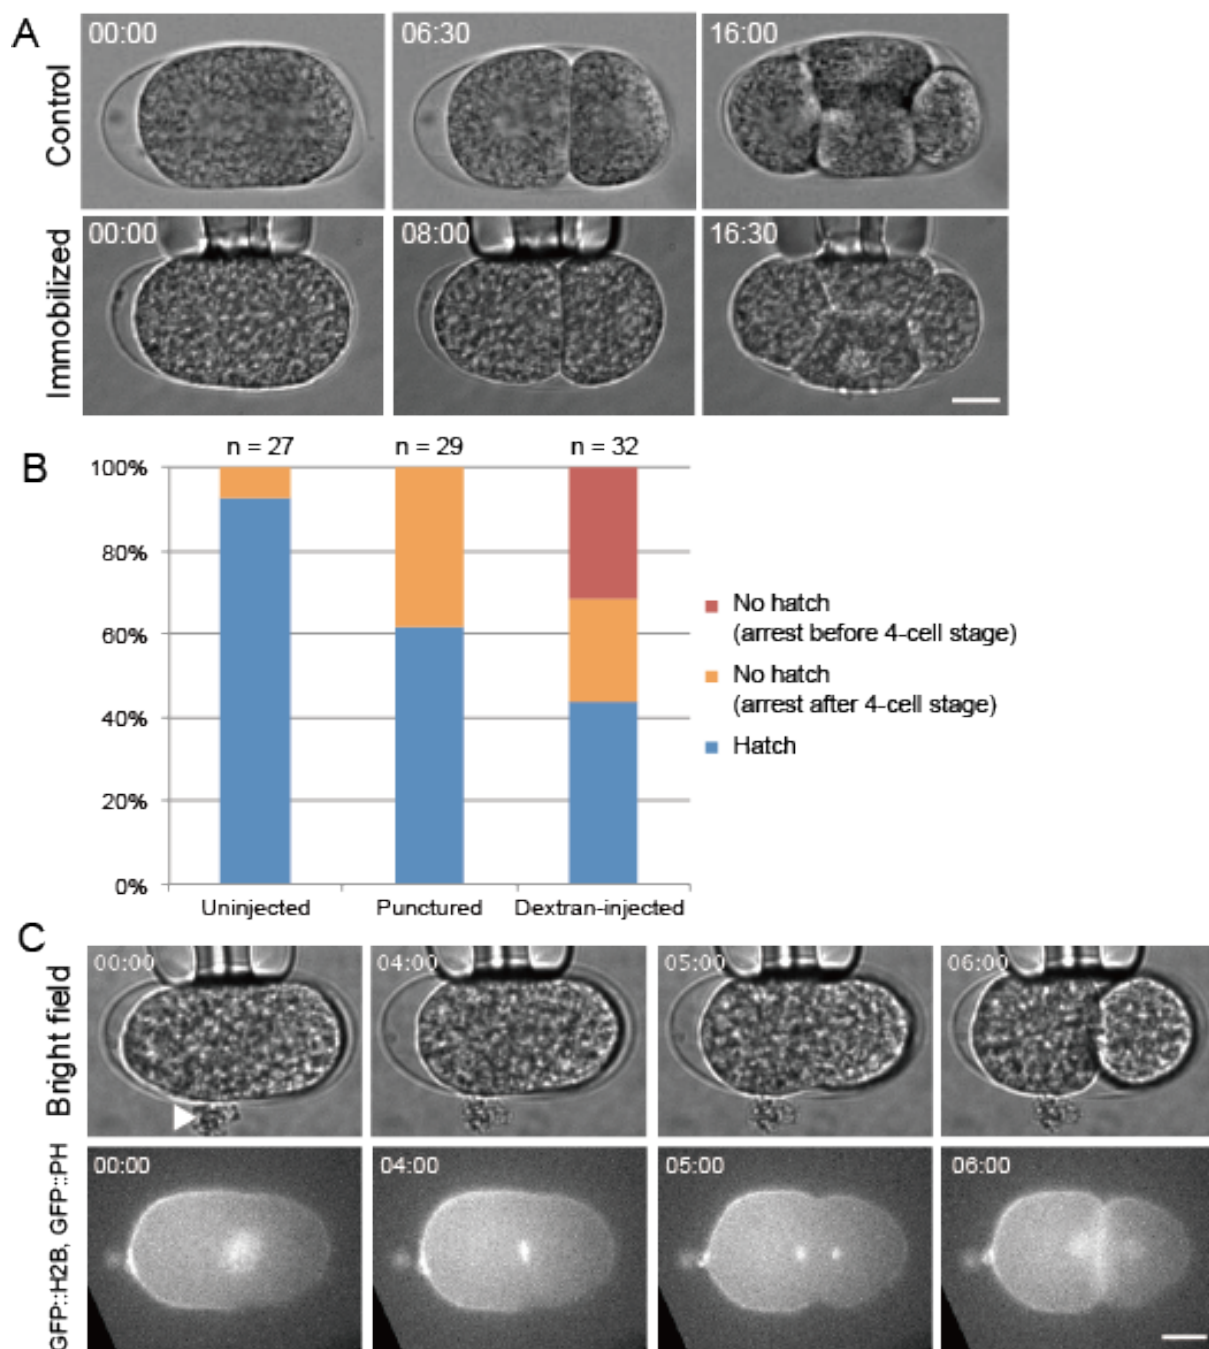

602

603 **Figure 3.** Micromanipulation of embryos and its effect on early embryogenesis. (A)

604 Immobilization by the holding pipette did not disturb early *C. elegans* embryogenesis.

605 Continuous images of control and immobilized embryo are shown. Immobilization of

606 the embryo by the holding pipette did not disturb early embryogenesis ( $n = 12/12$ ).

607 The number in the upper left corner of the images shows an elapsed time after the start

608 of observation (min:sec). The anterior is to the left. Bar, 10  $\mu\text{m}$ . (B) Rates of

609 completion of 4-cell stage and hatching in manipulated *C. elegans* embryos using glass  
610 needle methodology. Uninjected: embryo was immobilized by the holding pipette until  
611 the 4-cell stage with no needle insertion; punctured: a hole was made in the embryo by  
612 the glass needle but nothing was injected; dextran-injected: a hole was made in the  
613 embryo and Texas Red-dextran (MW = 3,000) in 0.8× egg buffer (EB) was injected.  
614 Embryos completing the 4-cell stage and those hatching were counted, and rates were  
615 determined. (C) Microinjection into 1-cell stage *C. elegans* embryos of CAL1041  
616 strain using the glass needles. Continuous images of an embryo injected with Texas  
617 Red-dextran (MW = 3,000) in 0.8× EB. Cytoplasm leakage was often observed at the  
618 injection site when the glass needle was withdrawn from the embryo (arrowhead).  
619 However, embryogenesis progressed even if the cytoplasm leaked out after puncture  
620 via microinjection. The number in the upper left corner of the images shows the  
621 elapsed time after the start of observation (min:sec). Texas Red-dextran was used to  
622 monitor the success of substance delivery upon microinjection, and time-lapse imaging  
623 was conducted for bright field and green channels. The anterior is to the left. Bar, 10  
624 μm.

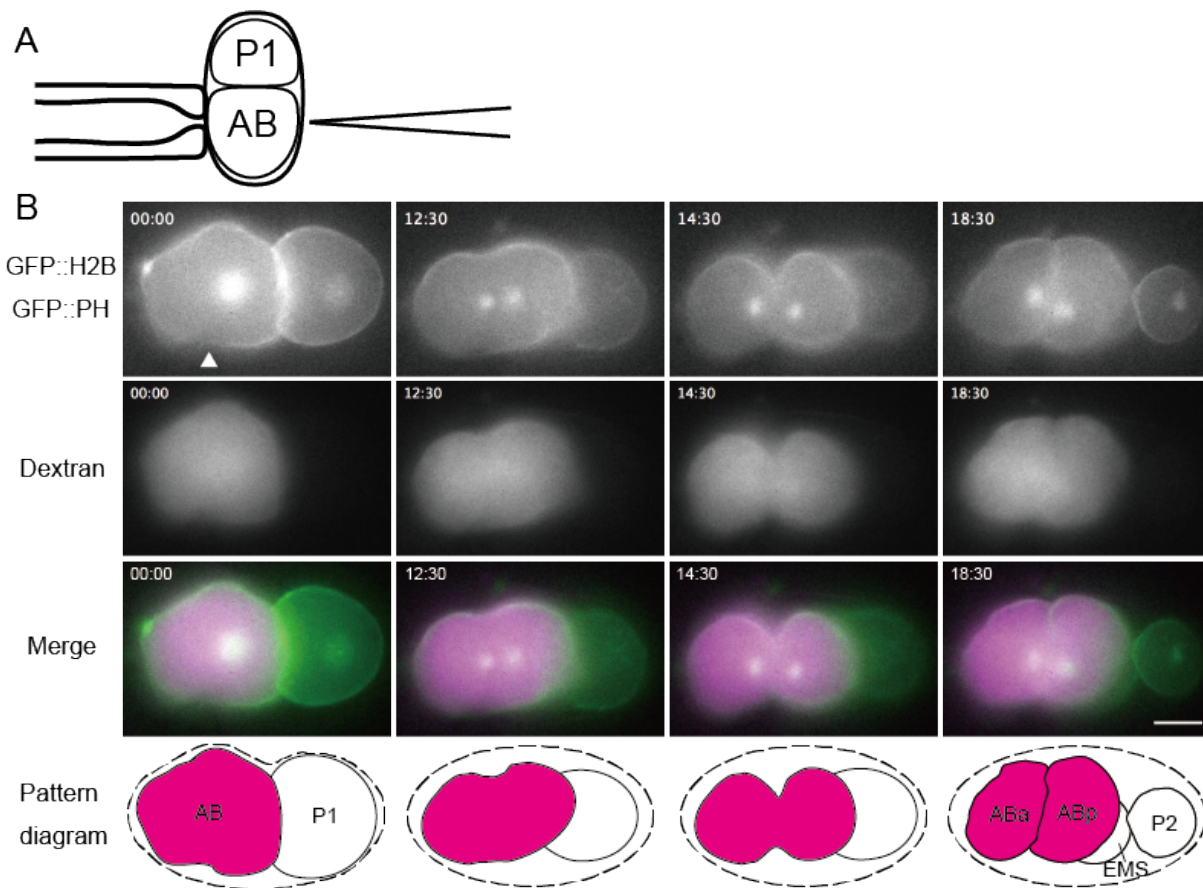

625

626 **Figure 4.** Dextran is distributed into a specific lineage of embryonic cells after  
627 microinjection. (A) Pattern diagram shows a capture position of the eggshell near the  
628 AB cell of the embryo and selective injection of dextran at the 2-cell stage. (B) Images  
629 show the dorsal view of the embryo. The number in the upper left corner of the images  
630 shows the elapsed time after the start of observation (min:sec). (00:00) Dextran was  
631 injected into the AB cell. The upper side of the AB cell was deformed by  
632 immobilization of the holding pipette and the lower side was deformed by injection of  
633 dextran. The arrowhead shows the dextran-injected site. (12:30) The AB cell had  
634 begun to divide. (14:30) AB cell immediately before completion of cell division.  
635 (18:30) At the 4-cell stage, fluorescent dextran was inherited only in the AB cell  
636 lineage. The bottom pattern diagrams are a summary of each stage. The dashed line  
637 indicates the presumed position of the eggshell. The anterior is to the left. Bar, 10  $\mu$ m.



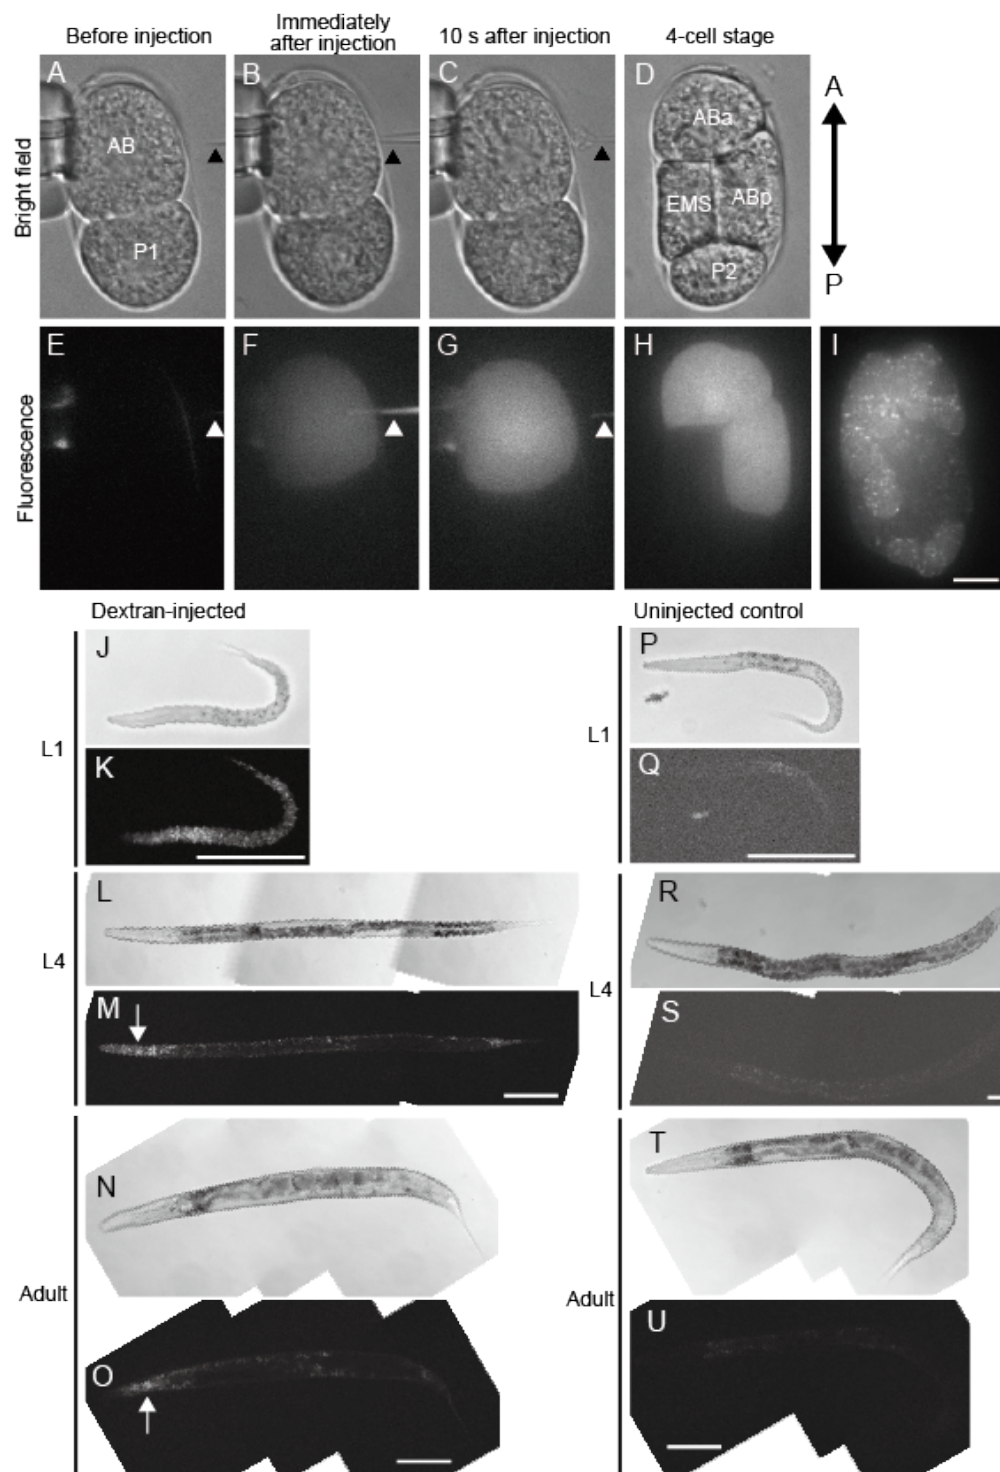

638

639 **Figure 5.** Injection and distribution of fluorescent dextran in the AB lineage. (A–H)

640 Injection of fluorescent dextran into the AB cell. (A–D) Bright field. (E–I)

641 Fluorescence. (I) An image at the ~100-cell stage of the same embryo as in (A–H).

642 Half of embryonic cells were observed to have a fluorescent dextran signal. (J–U)

643 Images of fluorescent dextran-injected (J–O) and uninjected control (P–U) embryos at



644 indicated stages. (J, L, N, P, R, T) bright field, (K, M, O, Q, S, U) fluorescence signal  
645 (561 nm excitation). Fluorescent signals were detected in the pharynx (arrows),  
646 hypodermis, and tail. (A–I) Bar, 10  $\mu\text{m}$ . (J–U) Bars, 100  $\mu\text{m}$ .

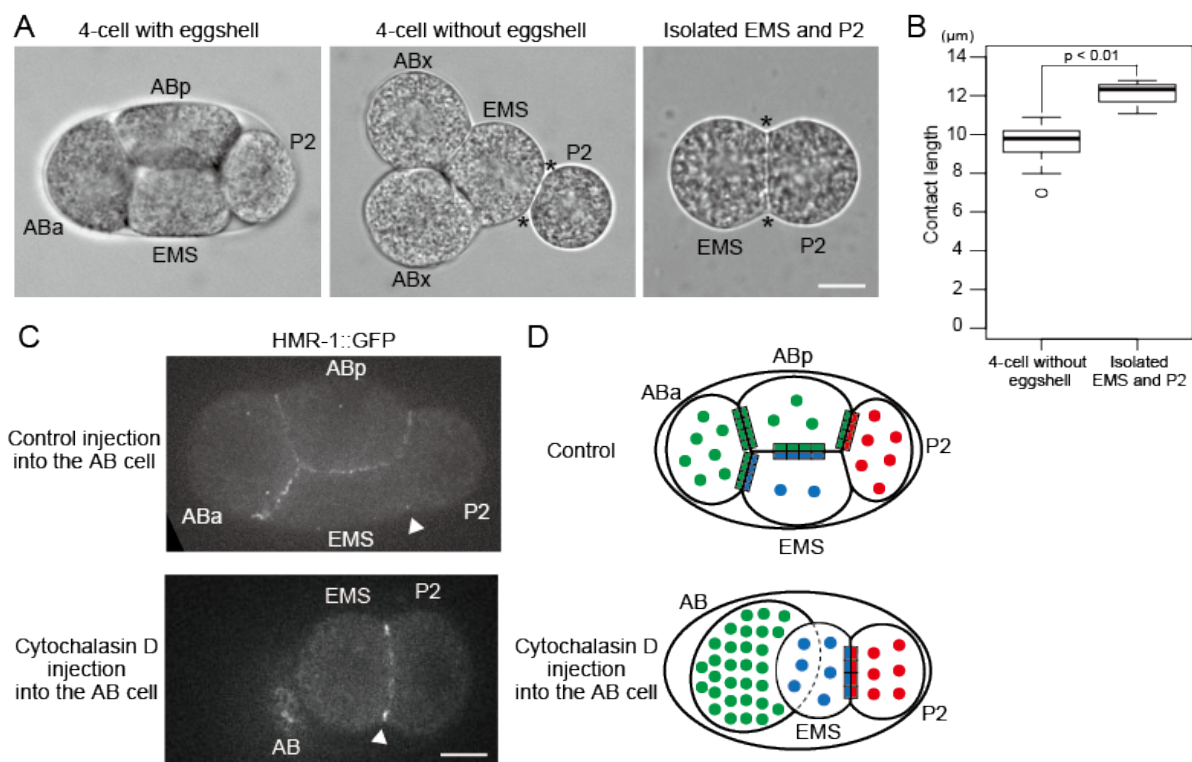

647

648 **Figure 6.** Injection of Cytochalasin D into the AB cell reveals cell-non-autonomous

649 effect on the adhesion strength between EMS and P2 cells. (A) Embryos at the 4-cell

650 stage with and without the eggshell, or without both the eggshell and the AB cell.

651 EMS and P2 cells adhered weakly compared to that with other combinations of cells

652 without the eggshell (middle). Further, removing AB daughter cells strengthened the

653 adhesion between EMS and P2 cells (right). (B) Boxplot of contact length (i.e. the

654 distance between the asterisks in (A)) between EMS and P2 cells with ( $n = 10$ ) or

655 without ( $n = 6$ ) EMS–ABx adhesion. The boxes show the 25th to 75th percentile

656 range. The lines inside the boxes represent the median. Whiskers extend to the most

657 extreme data point within 1.5 interquartile ranges from the box. The open circle is

658 outlier. (C) Embryos expressing HMR-1 (E-cadherin)::GFP (CAL1851 strain).

659 Arrowheads indicate cell–cell contact site between EMS and P2 cells. The signal at the

660 EMS/P2 border was weak in the control embryos, but was strong when Cytochalasin D

661 was injected into the AB cell. All focal planes of Cytochalasin D-injected embryo are  
662 shown in Video 4. ‘Control’ means injection of the solution without Cytochalasin D  
663 into the AB cell. (D) Schematic diagrams show the localization pattern of cadherins in  
664 control and Cytochalasin D-injected embryos. Circles show cadherin molecules within  
665 the cytoplasm and squares at the cell borders show cadherin molecules engaged in cell  
666 adhesion. Green, blue, and red colors indicate E-cadherin molecules in AB, EMS, and  
667 P2 cells, respectively. Note that the total number of circles and squares in each cell is  
668 constant. We propose that the EMS cell adheres strongly to the P2 cell in Cytochalasin  
669 D-injected blastomeres because the EMS cells does not adhere properly to the AB cell  
670 in this condition; thus, surpluses in E-cadherin participate in enhanced EMS–P2  
671 adhesion. Scale bars: 10  $\mu\text{m}$ .

672 **Supplementary Videos**

673

674 **Video 1.** Embryonic cells divide and the embryo hatches after microinjection. The *C.*  
675 *elegans* embryo was injected with egg buffer (EB) at the 1-cell stage. The embryo was  
676 the same cell as that shown in Figure 3C. The movie shows a dorsal view of the  
677 embryo from a single focal plane. These images were converted into 8-bit images and  
678 then converted into the movie after brightness and contrast were adjusted using the  
679 ‘auto’ setting of ImageJ software. The top left number indicates the elapsed time after  
680 the initial observation (min:sec).

681

682 **Video 2.** Location-specific injection into 2-cell stage embryos. The *C. elegans* embryo  
683 was injected with egg buffer (EB) and dextran into the AB cell at the 2-cell stage.  
684 Note that this embryo is different from the individual shown in Figure 4B. The embryo  
685 was transferred from the injection microscope to the CSU-X1 confocal microscope  
686 system, and thus the movie begins from the end of 2-cell stage. The movie shows a  
687 dorsal view of the embryo. Six different focal planes were stacked at each time point  
688 (Z interval = 5  $\mu\text{m}$ ). These stacked images were converted into 8-bit images and then  
689 converted into a movie after the brightness and contrast were adjusted (as performed  
690 for Video 1). Dextran was inherited in the AB cell lineage up to the 8-cell stage. The  
691 top left number indicates the elapsed time after starting the observation (min:sec).

692

693 **Video 3.** Distribution of fluorescent dextran signal within the embryo. This is the same  
694 stage embryo as Figure 5I. Confocal fluorescence images of the dextran-injected  
695 embryo were taken every 0.5  $\mu\text{m}$  along the z-axis at the same time point. These images  
696 were converted into 8-bit images and then converted into a movie after the brightness

697 and contrast were adjusted (as performed for Video 1). Half of the embryonic cells  
698 maintained the fluorescent dextran signal.

699

700 **Video 4.** Cytochalasin D injection into the AB cell results in strong adhesion between  
701 P1 daughter cells. Confocal fluorescence images of the embryo from Fig. 6C (lower),  
702 which was injected with Cytochalasin D into the AB cell at the 2-cell stage. The  
703 images were taken every 4  $\mu\text{m}$  along the z-axis at one time point. These images were  
704 converted into 8-bit images and then converted into a movie after the brightness and  
705 contrast were adjusted (as performed for Video 1). The Cytochalasin D-injected AB  
706 cell did not divide and was positioned next to the EMS cell. E-cadherin was no longer  
707 at the cortex of the AB cell. EMS and P2 cells strongly adhered to each other as  
708 compared to that observed in the control embryo (Fig. 6C, upper).
